# Supplementary material for: Multielement Characterization and Antioxidant Activity of Italian Extra-Virgin Olive Oils
Source: Front Chem. 2021 Nov 16;9:769620. doi: 10.3389/fchem.2021.769620 (PMC8635196; doi:10.3389/fchem.2021.769620)
Supplement: Supplementary file 1 [file Table1.docx]

Supplementary Material

Multi-element characterization and antioxidant activity of Italian extra-virgin olive oils

Maria Luisa Astolfi1*, Federico Marini1, Maria Agostina Frezzini2, Lorenzo Massimi2, Anna Laura Capriotti1, Carmela Maria Montone1, Silvia Canepari2

1Department of Chemistry, Sapienza University of Rome, Rome, Italy

2Department of Environmental Biology, Sapienza University of Rome, Rome, Italy

*** Correspondence:**Dr. Maria Luisa Astolfi, Department of Chemistry, Sapienza University of Rome, Rome, Italy.
[marialuisa.astolfi@uniroma1.it](mailto:marialuisa.astolfi@uniroma1.it)

**Table S1.** Element levels [mean or median (range minimum-maximum); g kg-1] in extra-virgin or virgin olive oils from different Mediterranean countries.

| **Reference** | **Country** | **Al** | **As** | **B** | **Be** | **Bi** | **Ca** | **Cd** | **Ce** | **Co** | **Cr** |
| --- | --- | --- | --- | --- | --- | --- | --- | --- | --- | --- | --- |
| **This study** | Italy | 34 (<9-1300) | <0.3 (<0.3-4.0) | <20 (<20-770) | <0.004 (<0.004-0.431) | <0.1 (<0.1-1 | 4090 (1230-35700) | 0.09 (<0.07-0.97) | 0.2 (0.1-3.5) | 0.12 (<0.05-2.16) | 5 (0.4-839) |
| Benincasa et al., 2007 | Italy (Calabria, Apulia, Umbria and  Abruzzo) | - | 1.25-26.6 | - | nd-0.182 | - | 1850-26900 | 0.088-0.366 | - | 0.023-0.413 | 116-437 |
| Camin et al., 2010 | Italy (South: Calabria, Apulia and Sicily; Centre: Lazio, Tuscany and Umbria; North: Veneto and Trentino) | - | - | - | - | - | 395-950 | - | 0.002-4.72 | 0.003-0.031 | - |
| Russo et al., 2020 | Italy  (Campania region) | 2.68-9.60 | - | - | - | - | 46.7-143.3 | - | - | - | - |
| Pošćić et al., 2019 | Croatia | - | - | - | - | - | 27.8 (7.14–212) | 0.001 (0.001–0.002) | 0.002 (0.001–0.04) | 0.003 (0.001–0.01) | 0.005 (0.005–0.58) |
| Beltran et al., 2015 | Spain (four  Spanish municipalities of Huelva) | 0.3-1.1 | 5.3-7.7 | - | - | - | 5.1-11.2 |  |  | 7.9-11.0 | 51.9-123.3 |
| Cabrera-Vique et al., 2012 | Spain (pooled data)  Granada province  Jaén province | - | - | - | - | - | - | - | - | - | 6.84-99.2 |
| Llorent-Martínez et al., 2011 | Spain | - | <3 | - | - | - | - | - | - | - | - |
| Llorent-Martínez et al., 2014 | Spain | 150-250 | 50 | - | - | - |  | 150 | - | 110 | 250 |
| Damak et al., 2019 | Tunisia (four geographical  Origins) | - | 10-29 | - | - | - | - | - | - | - | - |
| Gumus et al., 2017 | Turkey | - | 0.00-0.060 | - | - | - | 130-730 | - | - | 0.000-0.065 | 0.00-1.47 |

**Table S2.** Element levels [mean or median (range minimum-maximum); g kg-1] in extra-virgin or virgin olive oils from different Mediterranean countries.

| **Reference** | **Country** | **Cs** | **Cu** | **Dy** | **Fe** | **Ga** | **K** | **La** | **Li** | **Mg** | **Mn** |
| --- | --- | --- | --- | --- | --- | --- | --- | --- | --- | --- | --- |
| **This study** | Italy | 0.008 (<0.007-0.101) | 3.2 (<0.6-41.6) | <0.005 (<0.005-0.055) | 77 (<12-582) | <0.06 (<0.06-0.69) | <40 (<40-939) | 0.10 (<0.05-0.79) | <0.06 (<0.06-6.07) | 91 (21-723) | 2.4 (1.1-43.5) |
| Benincasa et al., 2007 | Italy (Calabria, Apulia, Umbria and  Abruzzo) | - | - | - | 89.3-551 | - | - | - | - | 56-1030 | nd-12.8 |
| Camin et al., 2010 | Italy (South: Calabria, Apulia and Sicily; Centre: Lazio, Tuscany and Umbria; North: Veneto and Trentino) | 0.083-0.819 | 0.127-26.3 | - | - | - | 33-9940 | 0.001-2.94 | 0.003-0.208 | 15-495 | 0.058-10.0 |
| Russo et al., 2020 | Italy  (Campania region) | - | 0.98-3.29 | - | 2.90-10.6 | - | 50.5-1200 | - | 0.23-43.5 | 11.5-66.5 | 0.32-1.07 |
| Pošćić et al., 2019 | Croatia | 0.001 (0.001–0.004) | 0.30 (0.06–1.99) | - | 1.11 (0.19–2.57) | - | 286 (7.28–1670) | 0.001 (0.001–0.02) | 0.01 (0.005–0.04) | 24.6 (2.31–99.2) | 0.25 (0.05–7.18) |
| Beltran et al., 2015 | Spain (four  Spanish municipalities of Huelva) | nd-0.2 | 13.9-47.2 | - | 0.5-1.2 | 1.6-4.5 | 5.9-6.9 | - | 2.9-6.4 | 0.6-0.9 | 0.1-0.2 |
| Cabrera-Vique et al., 2012 | Spain (pooled data)  Granada province  Jaén province | - | 3.35-66.47 | - | 25-273 | - | - | - | - | - | 11.6-69.4 |
| Llorent-Martínez et al., 2011(food control) | Spain | - | <8 | - | <40-120 | - | - | - | - | - | - |
| Llorent-Martínez et al., 2014 | Spain | - | 50 | - | <600 | - | - | - | - | - | - |
| Damak et al., 2019 | Tunisia (four geographical  Origins) | - | - | - | 280-570 | - | - | - | - | 850-1200 | 12-18 |
| Gumus et al., 2017 | Turkey | - | 0.112-2.020 | - | 1-14670 | - | 0.000-104 | - | - | 0.000-26 | 0.065-0.910 |

**Table S3.** Element levels [mean or median (range minimum-maximum); g kg-1] in extra-virgin or virgin olive oils from different Mediterranean countries.

| **Reference** | **Country** | **Mo** | **Na** | **Nb** | **Nd** | **Ni** | **P** | **Pb** | **Pr** | **Rb** | **Sb** | **Se** |
| --- | --- | --- | --- | --- | --- | --- | --- | --- | --- | --- | --- | --- |
| **This study** | Italy | <0.3 (<0.3-2.0) | 110 (<25-585) | <0.04 (<0.04-0.11) | 0.03 (<0.03-13.8) | 5.6 (2.1-49.7) | 272 (127-650) | 0.9 (<0.3-22.1) | <0.008 (<0.008-1.65) | 0.24 (<0.06-1.77) | <0.02 (<0.02-0.37) | <0.6 (<0.6-7.8) |
| Benincasa et al., 2007 | Italy (Calabria, Apulia, Umbria and  Abruzzo) | - | - | - | - | nd-46.9 | - | - | - | - | 0.194-0.411 | 1.47-6.78 |
| Camin et al., 2010 | Italy (South: Calabria, Apulia and Sicily; Centre: Lazio, Tuscany and Umbria; North: Veneto and Trentino) | - | 49-609 | - | - | - | - | 0.180-8.46 | - | 0.040-13.4 | - | - |
| Russo et al., 2020 | Italy  (Campania region) | - | 186-830 | - | - | - | 39-148 | 0.76-1.08 | - | - | - | - |
| Pošćić et al., 2019 | Croatia | 0.01 (0.003–0.01) | 4.92 (1.74–315) | - | - | 0.08 (0.05–0.14) | 28.2 (3.83–367) | 0.02 (0.02–0.52) | - | 0.24 (0.01–1.81) | 0.003 (0.002–0.01) | - |
| Beltran et al., 2015 | Spain (four  Spanish municipalities of Huelva) | 13.1-24.3 | 3.8-7.8 | 0.5-1.1 | - | 79.7-173.9 | - | 48.3-74.2 | - | 0.8-2.6 | - | 9.7-13.3 |
| Cabrera-Vique et al., 2012 | Spain (pooled data)  Granada province  Jaén province | - | - | - | - | 10.2-56.8 | - | - | - | - | - | - |
| Llorent-Martínez et al., 2011(food control) | Spain | - | - | - | - | - | - | <0.9 | - | - | - | - |
| Llorent-Martínez et al., 2014 | Spain | - | - | - | - | 130 | - | 50 | - | - | 100 | - |
| Damak et al., 2019 | Tunisia (four geographical  Origins) | - | 1600-4300 | - | - | - | - | 5-7.4 | - | 2.5-3.5 | - | - |
| Gumus et al., 2017 | Turkey | - | 0.023-0.106 | - | - | 0.18-2.59 | - | 0.03-1.31 | - | - | - | - |

**Table S4.** Element levels [mean or median (range minimum-maximum); g kg-1] in extra-virgin or virgin olive oils from different Mediterranean countries.

| **Reference** | **Country** | **Si** | **Sr** | **Tb** | **Te** | **Ti** | **Tl** | **U** | **V** | **W** | **Zn** | **Zr** |
| --- | --- | --- | --- | --- | --- | --- | --- | --- | --- | --- | --- | --- |
| **This study** | Italy | <270 (<270-3340) | 3 (1-58) | <0.006 (<0.006-1.28) | <0.03 (<0.03-0.06) | 1.9 (0.8-10.7) | <0.06 | <0.005 (<0.005-0.050) | 0.53 (<0.08-1.40) | <0.3 (<0.3-5.1) | 111 (54-749) | <0.1 (<0.1-2.3) |
| Benincasa et al., 2007 | Italy (Calabria, Apulia, Umbria and  Abruzzo) | - | nd-48.9 | - | - | - | - | - | - | - | - | - |
| Camin et al., 2010 | Italy (South: Calabria, Apulia and Sicily; Centre: Lazio, Tuscany and Umbria; North: Veneto and Trentino) | - | 1.12-3.85 | - | - | - | - | 0.0008-0.119 | - | - | - | - |
| Russo et al., 2020 | Italy  (Campania region) | - | - | - | - | - | - | - | - | - | 3.44-17.99 | - |
| Pošćić et al., 2019 | Croatia | - | 0.02 (0.01–0.17) | - | - | 0.01 (0.004–0.05) | <0.001 | - | 0.002 (0.002–0.01) | - | 0.88 (0.25–5.61) | - |
| Beltran et al., 2015 | Spain (four  Spanish municipalities of Huelva) | - | nd | - | - | nd | - | 0.1 | 13.8-18.4 | 0.7-4.1 | 149-328 | 3.1-4.3 |
| Llorent-Martínez et al., 2014 | Spain | - | - | - | - | - | - | - | 100 | - | - | - |
| Damak et al., 2019 | Tunisia (four geographical  Origins) | - | 33-37 | - | - | - | - | - | 4.8-5.2 | - | 170-290 | - |
| Gumus et al., 2017 | Turkey | - |  | - | - | - | - | - | 0.00-0.140 | - | 1.14-198 | - |

**Table S5.** Element levels [median, minimum (min) and maximum (max); g kg-1] and antioxidant activity (DPPH%) of EVOOs from northern Italy (Liguria, n=6; Lombardy, n=3; Trentino Alto Adige, n=7; and Veneto, n=3).

| **Element** | **Liguria** | | | | **Lombardy** | | | **Trentino Alto Adige** | | | **Veneto** | | |
| --- | --- | --- | --- | --- | --- | --- | --- | --- | --- | --- | --- | --- | --- |
| **median** | **min** | **max** | **median** | | **min** | **max** | **median** | **min** | **max** | **median** | **min** | **max** |
| **Ag** | <0.06 | <0.06 | 0.15 | <0.06 | | <0.06 | 0.26 | <0.06 | <0.06 | 0.13 | <0.06 | <0.06 | <0.06 |
| **Al** | 32 | <9 | 615 | 34 | | <9 | 175 | 21 | <9 | 484 | 39 | 34 | 44 |
| **As** | <0.3 | <0.3 | 0.4 | <0.3 | | <0.3 | 1.1 | <0.3 | <0.3 | 2.8 | <0.3 | <0.3 | 0.6 |
| **B** | <20 | <20 | 85 | <20 | | <20 | <20 | <20 | <20 | 74 | <20 | <20 | <20 |
| **Ba** | 0.9 | <0.7 | 13.0 | <0.7 | | <0.7 | 15.5 | 2.9 | <0.7 | 44.8 | <0.7 | <0.7 | <0.7 |
| **Be** | 0.004 | <0.004 | 0.008 | <0.004 | | <0.004 | 0.007 | 0.005 | <0.004 | 0.431 | <0.004 | <0.004 | <0.004 |
| **Bi** | <0.1 | <0.1 | 0.2 | <0.1 | | <0.1 | 0.1 | 0.1 | <0.1 | 0.1 | <0.1 | <0.1 | 0.1 |
| **Ca** | 4320 | 1840 | 7740 | 3610 | | 1560 | 4430 | 4800 | 1480 | 9170 | 5540 | 4740 | 8890 |
| **Cd** | 0.12 | <0.07 | 0.16 | 0.09 | | <0.07 | 0.16 | 0.17 | <0.07 | 0.33 | 0.12 | 0.10 | 0.14 |
| **Ce** | 0.3 | 0.1 | 0.4 | 0.2 | | 0.1 | 0.5 | 0.2 | 0.1 | 0.7 | 0.2 | 0.1 | 0.3 |
| **Co** | 0.16 | 0.05 | 0.29 | 0.25 | | <0.05 | 0.53 | 0.12 | 0.06 | 0.59 | 0.06 | <0.05 | 0.07 |
| **Cr** | 8 | 1 | 839 | 7 | | 1 | 86 | 6 | 1 | 24 | 3 | 1 | 4 |
| **Cs** | 0.017 | <0.007 | 0.051 | 0.017 | | 0.013 | 0.068 | 0.012 | <0.007 | 0.080 | 0.012 | 0.010 | 0.026 |
| **Cu** | 4.3 | <0.6 | 8.3 | 2.3 | | <0.6 | 4.5 | 6.1 | <0.6 | 20.7 | 7.6 | 4.8 | 11.8 |
| **Dy** | <0.005 | <0.005 | 0.010 | <0.005 | | <0.005 | 0.005 | <0.005 | <0.005 | 0.007 | <0.005 | <0.005 | <0.005 |
| **Fe** | 118 | 62 | 495 | 171 | | 27 | 183 | 136 | <12 | 283 | 218 | 191 | 223 |
| **Ga** | <0.06 | <0.06 | 0.24 | <0.06 | | <0.06 | 0.10 | <0.06 | <0.06 | 0.10 | <0.06 | <0.06 | 0.33 |
| **K** | <40 | <40 | 115 | <40 | | <40 | 116 | <40 | <40 | 293 | 89 | <40 | 154 |
| **La** | 0.16 | <0.05 | 0.22 | 0.17 | | <0.05 | 0.23 | 0.11 | <0.05 | 0.41 | 0.13 | 0.08 | 0.21 |
| **Li** | <0.06 | <0.06 | 0.45 | <0.06 | | <0.06 | 0.53 | <0.06 | <0.06 | 1.67 | <0.06 | <0.06 | 0.16 |
| **Mg** | 89 | 69 | 132 | 95 | | 58 | 103 | 98 | 42 | 262 | 164 | 110 | 171 |
| **Mn** | 2.9 | 2.4 | 6.1 | 2.3 | | 1.8 | 5.0 | 2.1 | 1.5 | 7.1 | 4.4 | 3.0 | 4.8 |
| **Mo** | <0.3 | <0.3 | 1.3 | <0.3 | | <0.3 | 0.7 | <0.3 | <0.3 | 0.6 | <0.3 | <0.3 | <0.3 |
| **Na** | 133 | 95 | 331 | 118 | | 116 | 120 | 169 | 87 | 298 | 174 | 142 | 229 |
| **Nb** | <0.04 | <0.04 | 0.05 | <0.04 | | <0.04 | <0.04 | <0.04 | <0.04 | 0.05 | <0.04 | <0.04 | <0.04 |
| **Nd** | 0.06 | 0.03 | 0.41 | 0.09 | | <0.03 | 0.71 | 0.07 | <0.03 | 1.39 | 0.05 | <0.03 | 0.08 |
| **Ni** | 6.3 | 3.0 | 29.5 | 2.8 | | 2.5 | 6.6 | 5.1 | 3.2 | 13.9 | 5.4 | 4.0 | 6.2 |
| **P** | 330 | 263 | 371 | 281 | | 272 | 360 | 276 | 220 | 650 | 313 | 310 | 317 |
| **Pb** | 1.2 | 0.4 | 2.1 | 1.4 | | 1.0 | 2.1 | 1.0 | 0.1 | 4.3 | 2.1 | 1.7 | 2.2 |
| **Pr** | 0.021 | <0.008 | 0.100 | 0.015 | | 0.009 | 0.173 | 0.012 | <0.008 | 0.359 | <0.008 | <0.008 | 0.012 |
| **Rb** | 0.29 | 0.20 | 0.77 | 0.36 | | 0.29 | 0.76 | 0.24 | 0.14 | 1.10 | 0.37 | 0.36 | 0.39 |
| **Sb** | <0.02 | <0.02 | <0.02 | <0.02 | | <0.02 | 0.04 | <0.02 | <0.02 | 0.04 | <0.02 | <0.02 | <0.02 |
| **Se** | 1.6 | <0.6 | 3.1 | <0.6 | | <0.6 | 5.2 | 0.6 | <0.6 | 6.8 | 0.6 | <0.6 | 3.0 |
| **Si** | <270 | <270 | <270 | <270 | | <270 | <270 | <270 | <270 | <270 | <270 | <270 | <270 |
| **Sn** | 0.10 | 0.06 | 0.45 | 0.06 | | <0.06 | 0.32 | 0.07 | <0.06 | 0.43 | 0.23 | 0.11 | 0.28 |
| **Sr** | 2 | 1 | 4 | 2 | | 1 | 3 | 3 | 1 | 7 | 5 | 3 | 5 |
| **Tb** | <0.006 | <0.006 | 0.022 | <0.006 | | <0.006 | 0.044 | <0.006 | <0.006 | 0.112 | <0.006 | <0.006 | <0.006 |
| **Te** | <0.03 | <0.03 | <0.03 | <0.03 | | <0.03 | <0.03 | <0.03 | <0.03 | <0.03 | <0.03 | <0.03 | 0.05 |
| **Ti** | 1.9 | 1.6 | 8.1 | 2.7 | | 1.6 | 2.8 | 2.4 | 1.6 | 6.2 | 2.2 | 1.5 | 4.7 |
| **Tl** | <0.06 | <0.06 | <0.06 | <0.06 | | <0.06 | <0.06 | <0.06 | <0.06 | <0.06 | <0.06 | <0.06 | <0.06 |
| **U** | 0.009 | <0.005 | 0.020 | 0.006 | | <0.005 | 0.044 | 0.007 | <0.005 | 0.039 | <0.005 | <0.005 | 0.012 |
| **V** | 0.53 | <0.08 | 0.74 | 0.38 | | <0.08 | 0.59 | 0.47 | 0.34 | 1.04 | 0.54 | 0.53 | 0.64 |
| **W** | <0.3 | <0.3 | 1.5 | 0.3 | | <0.3 | 1.1 | <0.3 | <0.3 | <0.3 | <0.3 | <0.3 | <0.3 |
| **Zn** | 111 | 63 | 236 | 90 | | 56 | 163 | 185 | 55 | 258 | 184 | 171 | 283 |
| **Zr** | 0.2 | 0.1 | 0.6 | 0.2 | | 0.1 | 0.3 | 0.1 | 0.1 | 0.5 | 0.2 | 0.1 | 0.3 |
| **%DPPH** | 15.7 | 9.2 | 20.7 | 22.6 | | 19.2 | 26.0 | 24.3 | 21.0 | 36.4 | 14.8 | 12.8 | 22.2 |

**Table S6.** Element levels [median, minimum (min) and maximum (max); g kg-1] and antioxidant activity (DPPH%) of EVOOs from central Italy (Abruzzo, n=14; Lazio, n=24; Marche, n=7; Tuscany, n=79; and Umbria, n=8).

| **Element** | **Abruzzo** | | | **Lazio** | | | **Marche** | | | **Tuscany** | | | **Umbria** | | |
| --- | --- | --- | --- | --- | --- | --- | --- | --- | --- | --- | --- | --- | --- | --- | --- |
| **median** | **min** | **max** | **median** | **min** | **max** | **median** | **min** | **max** | **median** | **min** | **max** | **median** | **min** | **max** |
| **Ag** | <0.06 | <0.06 | 0.10 | <0.06 | 0.03 | 0.86 | <0.06 | <0.06 | 0.07 | <0.06 | <0.06 | 0.20 | <0.06 | <0.06 | 0.06 |
| **Al** | 33 | <9 | 347 | 45 | <9 | 606 | 31 | 27 | 78 | 34 | <9 | 1291 | 29 | <9 | 66 |
| **As** | <0.3 | <0.3 | <0.3 | <0.3 | <0.3 | 1.9 | <0.3 | <0.3 | <0.3 | <0.3 | <0.3 | 4.0 | <0.3 | <0.3 | 1.2 |
| **B** | <20 | <20 | <20 | <20 | <20 | 530 | <20 | <20 | <20 | <20 | <20 | 734 | <20 | <20 | <20 |
| **Ba** | 7.1 | <0.7 | 175.1 | <0.7 | <0.7 | 36.8 | 37.9 | 3.6 | 110.8 | 3.2 | <0.7 | 170.2 | 4.0 | <0.7 | 63.6 |
| **Be** | <0.004 | <0.004 | 0.015 | <0.004 | <0.004 | 0.034 | <0.004 | <0.004 | <0.004 | <0.004 | <0.004 | 0.272 | <0.004 | <0.004 | 0.008 |
| **Bi** | <0.1 | <0.1 | 0.1 | <0.1 | <0.1 | 0.3 | <0.1 | <0.1 | <0.1 | <0.1 | <0.1 | 0.4 | <0.1 | <0.1 | 0.1 |
| **Ca** | 1880 | 1230 | 1880 | 4660 | 1600 | 35700 | 2140 | 1600 | 2890 | 3630 | 1330 | 14700 | 4370 | 1500 | 5550 |
| **Cd** | <0.07 | <0.07 | 0.12 | 0.14 | <0.07 | 0.46 | <0.07 | <0.07 | <0.07 | 0.08 | <0.07 | 0.97 | 0.09 | <0.07 | 0.23 |
| **Ce** | 0.1 | 0.1 | 0.4 | 0.3 | 0.1 | 3.5 | 0.1 | 0.1 | 0.1 | 0.2 | 0.1 | 2.5 | 0.1 | 0.1 | 0.8 |
| **Co** | 0.17 | 0.12 | 0.87 | 0.18 | <0.05 | 1.23 | 0.12 | 0.07 | 0.16 | 0.10 | <0.05 | 0.71 | <0.05 | <0.05 | 0.39 |
| **Cr** | 7.7 | 3.7 | 27.8 | 6.6 | 0.6 | 123 | 5.2 | 3.7 | 9.3 | 4.0 | <0.3 | 42.6 | 2.1 | 0.7 | 35.4 |
| **Cs** | 0.007 | <0.007 | 0.048 | 0.023 | <0.007 | 0.084 | <0.007 | <0.007 | <0.007 | <0.007 | <0.007 | 0.052 | 0.008 | <0.007 | 0.020 |
| **Cu** | 2.9 | <0.6 | 23.0 | 4.2 | <0.6 | 18.1 | 2.8 | 2.0 | 11.3 | 2.9 | <0.6 | 40.9 | 2.6 | <0.6 | 4.3 |
| **Dy** | <0.005 | <0.005 | <0.005 | 0.007 | <0.005 | 0.026 | <0.005 | <0.005 | <0.005 | <0.005 | <0.005 | 0.011 | <0.005 | <0.005 | <0.005 |
| **Fe** | 15 | <12 | 130 | 103 | <12 | 302 | 18 | 12 | 30 | 70 | <12 | 403 | 156 | 46 | 263 |
| **Ga** | <0.06 | <0.06 | <0.06 | <0.06 | <0.06 | 0.69 | <0.06 | <0.06 | <0.06 | <0.06 | <0.06 | 0.44 | <0.06 | <0.06 | <0.06 |
| **K** | <40 | <40 | 140 | <40 | <40 | 164 | <40 | <40 | <40 | <40 | <40 | 673 | <40 | <40 | 97 |
| **La** | <0.05 | <0.05 | 0.17 | 0.20 | <0.05 | 0.79 | <0.05 | <0.05 | 0.06 | 0.09 | <0.05 | 0.30 | 0.08 | <0.05 | 0.58 |
| **Li** | 0.06 | <0.06 | 0.65 | 0.13 | <0.06 | 6.07 | <0.06 | <0.06 | 0.13 | <0.06 | <0.06 | 2.51 | <0.06 | <0.06 | 0.27 |
| **Mg** | 56 | 35 | 385 | 115 | 46 | 723 | 48 | 28 | 90 | 89 | 21 | 307 | 93 | 59 | 122 |
| **Mn** | 2.2 | 1.5 | 10.8 | 4.1 | 1.5 | 8.7 | 1.9 | 1.4 | 2.4 | 2.2 | 1.1 | 18.6 | 2.3 | 1.6 | 3.5 |
| **Mo** | <0.3 | <0.3 | 0.3 | <0.3 | <0.3 | 0.9 | <0.3 | <0.3 | <0.3 | <0.3 | <0.3 | 1.7 | <0.3 | <0.3 | <0.3 |
| **Na** | 114 | <25 | 288 | 136 | 81 | 585 | 38 | <25 | 99 | 97 | 40 | 341 | 96 | 79 | 273 |
| **Nb** | <0.04 | <0.04 | <0.04 | <0.04 | <0.04 | 0.06 | <0.04 | <0.04 | <0.04 | <0.04 | <0.04 | 0.05 | <0.04 | <0.04 | <0.04 |
| **Nd** | <0.03 | <0.03 | 0.12 | 0.13 | <0.03 | 6.43 | <0.03 | <0.03 | <0.03 | <0.03 | <0.03 | 3.12 | 0.03 | <0.03 | 0.10 |
| **Ni** | 9.3 | 5.4 | 36.1 | 6.0 | 3.2 | 20.0 | 7.9 | 5.5 | 9.8 | 5.0 | 2.1 | 40.6 | 6.4 | 3.1 | 16.2 |
| **P** | 270 | 254 | 387 | 285 | 163 | 479 | 275 | 255 | 294 | 265 | 127 | 522 | 283 | 203 | 332 |
| **Pb** | 0.5 | <0.3 | 6.4 | 1.5 | <0.3 | 4.4 | 0.4 | 0.3 | 0.6 | 0.8 | <0.3 | 22.1 | 0.8 | <0.3 | 1.6 |
| **Pr** | <0.008 | <0.008 | 0.013 | 0.030 | <0.008 | 1.582 | <0.008 | <0.008 | <0.008 | <0.008 | <0.008 | 0.773 | 0.006 | <0.008 | 0.020 |
| **Rb** | 0.20 | 0.09 | 0.51 | 0.48 | 0.07 | 1.77 | 0.10 | 0.06 | 0.17 | 0.23 | 0.08 | 0.83 | 0.26 | 0.13 | 0.38 |
| **Sb** | <0.02 | <0.02 | 0.17 | <0.02 | <0.02 | 0.37 | <0.02 | <0.02 | <0.02 | <0.02 | <0.02 | 0.17 | <0.02 | <0.02 | <0.02 |
| **Se** | <0.6 | <0.6 | <0.6 | 0.9 | <0.6 | 5.3 | <0.6 | <0.6 | <0.6 | <0.6 | <0.6 | 6.9 | 1.8 | <0.6 | 5.9 |
| **Si** | <270 | <270 | <270 | <270 | <270 | <270 | <270 | <270 | <270 | <270 | <270 | 3344 | <270 | <270 | <270 |
| **Sn** | <0.06 | <0.06 | 0.29 | 0.12 | <0.06 | 0.60 | <0.06 | <0.06 | 0.13 | 0.06 | <0.06 | 0.50 | <0.06 | <0.06 | 0.14 |
| **Sr** | 1 | 1 | 34 | 4 | 1 | 23 | 1 | 1 | 4 | 3 | 1 | 19 | 3 | 1 | 7 |
| **Tb** | <0.006 | <0.006 | 0.006 | <0.006 | 0.003 | 1.133 | <0.006 | <0.006 | <0.006 | <0.006 | <0.006 | 0.237 | <0.006 | <0.006 | 0.006 |
| **Te** | <0.03 | <0.03 | 0.05 | <0.03 | <0.03 | <0.03 | <0.03 | <0.03 | <0.03 | <0.03 | <0.03 | 0.03 | <0.03 | <0.03 | <0.03 |
| **Ti** | 1.6 | 1.3 | 3.5 | 2.7 | 1.2 | 5.6 | 1.5 | 1.2 | 2.0 | 1.7 | 0.8 | 4.2 | 1.9 | 1.2 | 2.8 |
| **Tl** | <0.06 | <0.06 | <0.06 | <0.06 | <0.06 | 0.08 | <0.06 | <0.06 | <0.06 | <0.06 | <0.06 | <0.06 | <0.06 | <0.06 | <0.06 |
| **U** | <0.005 | <0.005 | 0.008 | 0.012 | <0.005 | 0.044 | <0.005 | <0.005 | <0.005 | <0.005 | <0.005 | 0.027 | <0.005 | <0.005 | 0.006 |
| **V** | 0.39 | 0.13 | 0.70 | 0.60 | 0.15 | 1.06 | 0.32 | 0.25 | 0.52 | 0.54 | <0.08 | 1.21 | 0.58 | 0.15 | 0.80 |
| **W** | <0.3 | <0.3 | 1.0 | 0.5 | <0.3 | 1.8 | <0.3 | <0.3 | <0.3 | <0.3 | <0.3 | 2.3 | <0.3 | <0.3 | 0.3 |
| **Zn** | 68 | 58 | 177 | 150 | 60 | 749 | 75 | 61 | 97 | 98 | 54 | 409 | 147 | 60 | 189 |
| **Zr** | 0.1 | 0.1 | 0.7 | 0.2 | 0.1 | 1.6 | 0.1 | 0.1 | 0.7 | 0.1 | 0.1 | 1.8 | 0.1 | 0.1 | 0.2 |
| **%DPPH** | 47.0 | 19.7 | 63.1 | 31.6 | 8.0 | 49.2 | 34.7 | 23.6 | 39.0 | 36.2 | 9.4 | 66.0 | 29.8 | 27.4 | 36.8 |

**Table S7.** Element levels [median, minimum (min) and maximum (max); g kg-1] and antioxidant activity (DPPH%) of EVOOs from southern Italy (Calabria, n=12; Campania, n=7; Apulia, n=33; Sardinia, n=12; and Sicily, n=21).

| **Element** | **Calabria** | | | **Campania** | | | **Apulia** | | | **Sardinia** | | | **Sicily** | | |
| --- | --- | --- | --- | --- | --- | --- | --- | --- | --- | --- | --- | --- | --- | --- | --- |
| **median** | **min** | **max** | **median** | **min** | **max** | **median** | **min** | **max** | **median** | **min** | **max** | **median** | **min** | **max** |
| **Ag** | <0.06 | <0.06 | 0.11 | <0.06 | <0.06 | <0.06 | <0.06 | <0.06 | 0.22 | <0.06 | <0.06 | 0.15 | <0.06 | <0.06 | 0.22 |
| **Al** | 33 | 15 | 694 | 35 | <9 | 43 | 53 | 23 | 1298 | 21 | <9 | 36 | 33 | <9 | 323 |
| **As** | <0.3 | <0.3 | 0.8 | <0.3 | <0.3 | <0.3 | <0.3 | <0.3 | 1.0 | <0.3 | <0.3 | 1.8 | 0.6 | <0.3 | 2.2 |
| **B** | <20 | <20 | 425 | <20 | <20 | <20 | <20 | <20 | 770 | <20 | <20 | 245 | <20 | <20 | 182 |
| **Ba** | <0.7 | <0.7 | 33.1 | 17.5 | 3.9 | 86.9 | <0.7 | <0.7 | 147.1 | 2.8 | <0.7 | 42.2 | <0.7 | <0.7 | 123.4 |
| **Be** | <0.004 | <0.004 | 0.017 | <0.004 | <0.004 | 0.006 | 0.004 | <0.004 | 0.061 | <0.004 | <0.004 | 0.011 | 0.013 | <0.004 | 0.048 |
| **Bi** | <0.1 | <0.1 | 0.2 | <0.1 | <0.1 | 0.4 | <0.1 | <0.1 | 0.2 | <0.1 | <0.1 | 0.1 | <0.1 | <0.1 | 1.0 |
| **Ca** | 4830 | 2040 | 11500 | 2050 | 1430 | 2610 | 4090 | 1640 | 24100 | 4210 | 1700 | 6790 | 4980 | 1480 | 8590 |
| **Cd** | 0.12 | <0.07 | 0.31 | <0.07 | <0.07 | 0.09 | 0.11 | <0.07 | 0.61 | 0.09 | <0.07 | 0.21 | 0.10 | <0.07 | 0.41 |
| **Ce** | 0.2 | 0.1 | 1.0 | 0.1 | 0.1 | 0.1 | 0.2 | 0.1 | 0.9 | 0.1 | 0.1 | 0.2 | 0.2 | 0.1 | 1.0 |
| **Co** | 0.09 | <0.05 | 2.16 | 0.22 | 0.06 | 0.63 | 0.08 | <0.05 | 1.68 | 0.16 | <0.05 | 0.27 | <0.05 | <0.05 | 0.79 |
| **Cr** | 5.2 | 0.5 | 532.7 | 6.0 | 3.6 | 17.8 | 3.4 | 1.0 | 154.1 | 5.1 | 0.5 | 15.8 | 3.7 | 1.1 | 251.9 |
| **Cs** | 0.010 | <0.007 | 0.060 | <0.007 | <0.007 | 0.023 | 0.008 | <0.007 | 0.101 | 0.010 | <0.007 | 0.025 | 0.007 | <0.007 | 0.071 |
| **Cu** | 3.9 | <0.6 | 18.7 | 3.5 | 2.0 | 41.6 | 3.9 | 2.0 | 28.0 | 1.4 | <0.6 | 6.0 | 3.2 | 1.8 | 21.9 |
| **Dy** | <0.005 | <0.005 | 0.013 | <0.005 | <0.005 | <0.005 | <0.005 | <0.005 | 0.032 | <0.005 | <0.005 | <0.005 | <0.005 | <0.005 | 0.055 |
| **Fe** | 147 | 35 | 262 | 24 | 15 | 38 | 74 | 14 | 197 | 99 | 19 | 193 | 121 | 17 | 582 |
| **Ga** | <0.06 | <0.06 | 0.27 | <0.06 | <0.06 | <0.06 | <0.06 | <0.06 | 0.35 | <0.06 | <0.06 | <0.06 | <0.06 | <0.06 | 0.59 |
| **K** | <40 | <40 | 63 | <40 | <40 | 80 | <40 | <40 | 939 | <40 | <40 | 138 | <40 | <40 | 479 |
| **La** | 0.11 | <0.05 | 0.38 | <0.05 | <0.05 | <0.05 | 0.12 | <0.05 | 0.56 | 0.06 | <0.05 | 0.13 | 0.13 | <0.05 | 0.71 |
| **Li** | <0.06 | <0.06 | 0.32 | <0.06 | <0.06 | 0.29 | <0.06 | <0.06 | 4.42 | <0.06 | <0.06 | 0.23 | <0.06 | <0.06 | 1.07 |
| **Mg** | 104 | 58 | 223 | 51 | 38 | 61 | 102 | 33 | 613 | 86 | 42 | 155 | 98 | 28 | 152 |
| **Mn** | 2.7 | 2.1 | 11.6 | 2.7 | 1.7 | 5.4 | 3.0 | 1.4 | 10.2 | 2.2 | 1.7 | 3.6 | 2.6 | 1.5 | 43.5 |
| **Mo** | <0.3 | <0.3 | 0.9 | <0.3 | <0.3 | 0.4 | <0.3 | <0.3 | 2.0 | <0.3 | <0.3 | <0.3 | <0.3 | <0.3 | 0.7 |
| **Na** | 134 | 92 | 458 | 65 | <25 | 92 | 117 | <25 | 390 | 141 | 91 | 229 | 102 | 35 | 513 |
| **Nb** | <0.04 | <0.04 | 0.05 | <0.04 | <0.04 | <0.04 | <0.04 | <0.04 | 0.11 | <0.04 | <0.04 | <0.04 | <0.04 | <0.04 | 0.06 |
| **Nd** | 0.05 | <0.03 | 0.63 | <0.03 | <0.03 | 0.17 | 0.03 | <0.03 | 13.83 | <0.03 | <0.03 | 0.07 | 0.03 | <0.03 | 6.77 |
| **Ni** | 6.8 | 3.1 | 9.6 | 8.4 | 5.5 | 27.0 | 4.5 | 2.4 | 49.7 | 6.4 | 3.1 | 9.8 | 4.2 | 2.7 | 19.1 |
| **P** | 296 | 206 | 358 | 271 | 250 | 336 | 268 | 189 | 380 | 293 | 218 | 383 | 266 | 206 | 548 |
| **Pb** | 1.2 | <0.3 | 3.4 | 0.4 | <0.3 | 1.6 | 1.1 | 0.3 | 7.4 | 0.7 | <0.3 | 1.4 | 1.3 | <0.3 | 8.7 |
| **Pr** | <0.008 | <0.008 | 0.152 | <0.008 | <0.008 | 0.011 | <0.008 | <0.008 | 0.681 | <0.008 | <0.008 | 0.012 | <0.008 | <0.008 | 1.653 |
| **Rb** | 0.24 | 0.18 | 0.59 | 0.17 | 0.06 | 0.25 | 0.27 | <0.06 | 1.23 | 0.24 | 0.13 | 0.55 | 0.26 | 0.08 | 1.36 |
| **Sb** | <0.02 | <0.02 | 0.12 | <0.02 | <0.02 | <0.02 | <0.02 | <0.02 | 0.14 | <0.02 | <0.02 | 0.03 | <0.02 | <0.02 | 0.03 |
| **Se** | 1.2 | <0.6 | 3.6 | <0.6 | <0.6 | <0.6 | 0.6 | <0.6 | 5.8 | 0.8 | <0.6 | 4.1 | 1.5 | <0.6 | 7.8 |
| **Si** | <270 | <270 | <270 | <270 | <270 | <270 | <270 | <270 | <270 | <270 | <270 | 442 | <270 | <270 | <270 |
| **Sn** | 0.12 | <0.06 | 0.29 | <0.06 | <0.06 | 0.40 | 0.14 | <0.06 | 1.94 | 0.06 | <0.06 | 0.48 | 0.07 | <0.06 | 0.79 |
| **Sr** | 4 | 1 | 7 | 1 | 1 | 1 | 3 | 1 | 58 | 2 | 1 | 7 | 4 | 1 | 52 |
| **Tb** | <0.006 | <0.006 | 0.039 | <0.006 | <0.006 | <0.006 | <0.006 | <0.006 | 1.279 | <0.006 | <0.006 | <0.006 | <0.006 | <0.006 | 0.504 |
| **Te** | <0.03 | <0.03 | <0.03 | <0.03 | <0.03 | <0.03 | <0.03 | <0.03 | 0.03 | <0.03 | <0.03 | <0.03 | <0.03 | <0.03 | 0.06 |
| **Ti** | 1.9 | 1.3 | 4.9 | 1.5 | 1.2 | 10.7 | 2.9 | 1.1 | 4.6 | 1.9 | 1.3 | 2.5 | 2.4 | 1.4 | 4.5 |
| **Tl** | <0.06 | <0.06 | <0.06 | <0.06 | <0.06 | <0.06 | <0.06 | <0.06 | <0.06 | <0.06 | <0.06 | <0.06 | <0.06 | <0.06 | <0.06 |
| **U** | <0.005 | <0.005 | 0.029 | <0.005 | <0.005 | <0.005 | <0.005 | <0.005 | 0.050 | <0.005 | <0.005 | 0.005 | <0.005 | <0.005 | 0.050 |
| **V** | 0.52 | 0.04 | 0.80 | 0.30 | <0.08 | 0.47 | 0.67 | <0.08 | 1.40 | 0.49 | 0.40 | 0.76 | 0.74 | <0.08 | 0.88 |
| **W** | <0.3 | <0.3 | 1.0 | <0.3 | <0.3 | <0.3 | <0.3 | <0.3 | 5.1 | <0.3 | <0.3 | 0.7 | <0.3 | <0.3 | 2.1 |
| **Zn** | 147 | 59 | 346 | 67 | 58 | 95 | 114 | 61 | 672 | 151 | 59 | 210 | 167 | 57 | 261 |
| **Zr** | 0.1 | 0.1 | 0.5 | 0.1 | 0.1 | 0.1 | 0.2 | 0.1 | 2.3 | 0.1 | 0.1 | 0.1 | 0.1 | 0.1 | 0.7 |
| **%DPPH** | 22.9 | 10.9 | 43.1 | 28.3 | 19.1 | 67.3 | 37.6 | 14.4 | 53.1 | 28.0 | 14.2 | 40.7 | 18.2 | 8.3 | 45.3 |

**Table S8.** Spearman’s correlation coefficients of the antioxidant activity (DPPH%) and elements of EVOOsa.

|  | **DPPH%** | **Region** | | | | | | |
| --- | --- | --- | --- | --- | --- | --- | --- | --- |
| **Elements** | **All samples** | **Abruzzo** | **Lazio** | **Tuscany** | **Calabria** | **Apulia** | **Sardinia** | **Sicily** |
| **Ag** | -0.041 | 0.126 | -0.261 | 0.133 | -0.082 | -0.342 | 0.044 | -0.105 |
| **Al** | 0.031 | 0.553* | -0.279 | 0.133 | -0.467 | -0.290 | 0.500 | -0.483* |
| **As** | -0.231** | ndb | -0.327 | -0.355** | 0.548 | -0.343 | 0.560 | -0.220 |
| **B** | -0.159* | ndb | 0.189 | -0.200 | -0.548 | -0.332 | 0.624* | -0.268 |
| **Ba** | 0.336** | 0.371 | 0.129 | 0.336** | 0.495 | 0.500* | -0.247 | 0.182 |
| **Be** | -0.236** | -0.574* | -0.281 | -0.218 | -0.037 | -0.008 | -0.239 | -0.015 |
| **Bi** | -0.130 | -0.224 | -0.364 | -0.071 | -0.342 | -0.334 | 0.480 | -0.490* |
| **Ca** | -0.305** | 0.534* | -0.182 | -0.350** | -0.683* | -0.492* | 0.343 | -0.341 |
| **Cd** | -0.340** | -0.256 | -0.226 | -0.409** | -0.343 | -0.548* | 0.329 | -0.273 |
| **Ce** | -0.371** | 0.094 | -0.455* | -0.453** | -0.583 | -0.439* | 0.537 | -0.635** |
| **Co** | 0.016 | 0.213 | -0.504* | 0.100 | 0.059 | -0.005 | -0.513 | -0.199 |
| **Cr** | -0.007 | 0.130 | -0.340 | 0.041 | -0.050 | -0.005 | -0.378 | -0.083 |
| **Cs** | -0.319** | -0.505 | -0.486* | -0.272* | 0.059 | -0.437* | -0.253 | -0.464 |
| **Cu** | 0.047 | 0.458 | -0.016 | 0.076 | -0.390 | 0.074 | 0.544 | -0.355 |
| **Dy** | -0.194** | ndb | -0.561** | -0.133 | -0.059 | -0.212 | ndb | -0.497* |
| **Fe** | -0.360** | 0.569* | -0.039 | -0.398** | -0.550 | -0.377 | 0.490 | -0.287 |
| **Ga** | -0.222** | ndb | -0.306 | -0.050 | -0.342 | -0.296 | ndb | -0.490* |
| **K** | -0.084 | 0.366 | -0.414* | -0.082 | 0.411 | -0.007 | 0.184 | -0.385 |
| **La** | -0.430** | -0.351 | -0.458* | -0.518** | -0.500 | -0.497* | 0.466 | -0.620** |
| **Li** | -0.095 | 0.240 | -0.294 | -0.161 | -0.018 | -0.376 | -0.100 | -0.144 |
| **Mg** | -0.355** | 0.213 | -0.399 | -0.402** | -0.583 | -0.581** | 0.420 | -0.441 |
| **Mn** | -0.268** | 0.240 | -0.470* | -0.264* | -0.617 | -0.256 | 0.671* | -0.615** |
| **Mo** | -0.144* | 0.103 | -0.330 | -0.026 | -0.342 | -0.270 | ndb | 0.063 |
| **Na** | -0.280** | -0.059 | -0.231 | -0.305** | -0.383 | -0.559** | -0.629* | -0.213 |
| **Nb** | -0.140* | ndb | -0.160 | 0.023 | -0.342 | -0.209 | ndb | 0.053 |
| **Nd** | -0.341** | -0.297 | -0.548** | -0.322** | -0.033 | -0.308 | 0.146 | -0.490* |
| **Ni** | 0.141* | 0.218 | -0.298 | 0.230* | -0.100 | 0.248 | -0.448 | 0.292 |
| **P** | -0.191** | -0.108 | -0.621** | -0.093 | 0.083 | 0.034 | -0.266 | -0.365 |
| **Pb** | -0.257** | 0.389 | -0.235 | -0.257* | -0.717* | -0.412 | 0.521 | -0.564* |
| **Pr** | -0.315** | -0.750** | -0.602** | -0.251* | 0.044 | -0.398 | -0.516 | -0.576* |
| **Rb** | -0.321** | -0.024 | -0.450* | -0.292** | -0.433 | -0.506* | 0.357 | -0.574* |
| **Sb** | -0.057 | 0.321 | -0.540** | -0.093 | 0.274 | -0.210 | 0.131 | 0.211 |
| **Se** | -0.264** | ndb | 0.135 | -0.367** | -0.164 | -0.389 | 0.616* | -0.127 |
| **Si** | 0.019 | ndb | ndb | 0.073 | ndb | ndb | -0.218 | nd |
| **Sn** | -0.187** | -0.023 | -0.295 | -0.083 | -0.700* | -0.233 | -0.203 | -0.437 |
| **Sr** | -0.294** | 0.260 | -0.350 | -0.316** | -0.109 | -0.252 | 0.537 | -0.420 |
| **Tb** | -0.231** | -0.310 | -0.459* | -0.198 | -0.342 | -0.274 | ndb | -0.512* |
| **Te** | -0.183** | -0.447 | nd | -0.084 | ndb | ndb | ndb | -0.158 |
| **Ti** | -0.342** | -0.015 | -0.457* | -0.471** | -0.600 | -0.410 | 0.399 | -0.792** |
| **Tl** | 0.020 | ndb | 0.105 | ndb | ndb | ndb | ndb | ndb |
| **U** | -0.312** | -0.713** | -0.546** | -0.292** | -0.129 | -0.416 | -0.044 | -0.349 |
| **V** | -0.090 | 0.543* | 0.069 | -0.193 | 0.467 | -0.225 | 0.678* | -0.228 |
| **W** | -0.111 | -0.594* | -0.323 | -0.065 | 0.000 | -0.234 | -0.367 | 0.093 |
| **Zn** | -0.281** | 0.503 | -0.075 | -0.355** | -0.433 | -0.440* | 0.315 | -0.233 |
| **Zr** | -0.194** | 0.768** | -0.264 | -0.081 | -0.661 | -0.438* | 0.437 | -0.578* |

* Correlation is significant at the 0.05 level (two-tailed). ** Correlation is significant at the 0.01 level (two-tailed).

a Only regions with at least 10 EVOO samples were considered.

b nd, not determined.

# References

Beltrán, M., Sánchez-Astudillo, M., Aparicio, R., and García-González, D. L. (2015). Geographical traceability of virgin olive oils from south-western Spain by their multi-elemental composition. *Food Chem.* 169, 350–357. doi: 10.1016/j.foodchem.2014.07.104.

Benincasa, C., Lewis, J., Perri, E., Sindona, G., and Tagarelli, A. (2007). Determination of trace element in Italian virgin olive oils and their characterization according to geographical origin by statistical analysis. *Anal. Chim. Acta* 585, 366–370. doi: 10.1016/j.aca.2006.12.040.

Cabrera-Vique, C., Bouzas, P.R., Oliveras-López, M.J. (2012). Determination of trace elements in extra virgin olive oils: A pilot study on the geographical characterisation, Food Chem. 134(1), 434–439. doi: 10.1016/j.foodchem.2012.02.088.

Camin, F., Larcher, R., Perini, M., Bontempo, L., Bertoldi, D., Gagliano, G., Nicolini, G., and Versini, G. (2010). Characterisation of authentic Italian extra-virgin olive oils by stable isotope ratios of C, O and H and mineral composition. *Food Chem.* 118, 901–909. doi: 10.1016/j.foodchem.2008.04.059.

Damak, F., Asano, M., Baba, K., Suda, A., Araoka, D., Wali, A., Isoda. H., Nakajima, M., Ksibi, M., and Tamura, K. (2019). Interregional traceability of Tunisian olive oils to the provenance soil by multielemental fingerprinting and chemometrics. *Food Chem.* 283, 656–664. doi: 10.1016/j.foodchem.2019.01.082.

Gumus, Z.P., Celenk, V. U., Tekin, S., Yurdakul, O., and Ertas, H. (2017). Determination of trace elements and stable carbon isotope ratios in virgin olive oils from Western Turkey to authenticate geographical origin with a chemometric approach. *Eur. Food Res. Technol.* 243, 1719–1727. doi: 10.1007/s00217-017-2876-4.

Llorent-Martínez, E. J., Ortega-Barrales, P., Fernández-de Córdova, M. L., and Ruiz-Medina, A. (2011). Analysis of the legislated metals in different categories of olive and olive-pomace oils. *Food Control* 22, 221–225. doi: 10.1016/j.foodcont.2010.07.002.

Llorent-Martinez, E. J., Fernandez-de Cordova, M. L., Ortega-Barrales, P., and Ruiz-Medina, A. (2014). Quantitation of metals during the extraction of virgin olive oil from olives using ICP-MS after microwave-assisted acid digestion. *J. Am. Oil Chem. Soc.* 91, 1823–1830. doi: 10.1007/s11746-014-2511-5.

Pošćić, F., Turk, M. F., Bačić, N., Mikac, N., Bertoldi, D., Camin, F., Špika, M. J., Žanetić, M., Rengel, Z., and Perica, S. (2019). Removal of pomace residues is critical in quantification of element concentrations in extra virgin olive oil. *J. Food Compos. Anal.* 77, 39–46. doi: 10.1016/j.jfca.2019.01.002.

Russo, G., Beritognolo, I., Bufacchi, M., Stanzione, V., Pisanelli, A., Ciolfi, M., Lauteri, M., and Brush, S. B. (2020). Advances in biocultural geography of olive tree (Olea europaea L.) landscapes by merging biological and historical assays. *Sci. Rep.* 10, 7673. doi: 10.1038/s41598-020-64063-8
